# Supplementary material
Source: PubMed Central journal article supplement (PMC7966067)
Supplement: 2522_table.pdf [file 2522_table.pdf]

**On-line Table 1: Severe adverse events**

| Event No. | Diagnosis                                                            | Other Medications                                           | Event                                                                                                               | Outcome                                                  | Possible Attribution (Determined by On-Site Investigator) |
|-----------|----------------------------------------------------------------------|-------------------------------------------------------------|---------------------------------------------------------------------------------------------------------------------|----------------------------------------------------------|-----------------------------------------------------------|
| 1         | Severe traumatic brain Injury                                        | Morphine (10 mg), 10-mg cisatracurium besylate              | Bradycardia progressing to asystole requiring resuscitation                                                         | Returned to neurologic baseline                          | Underlying condition                                      |
| 2         | R cavernous carotid aneurysm                                         | None noted                                                  | Seizure after balloon inflation, before xenon administration; second seizure within seconds of xenon administration | Study terminated, patient returned to baseline           | Procedure                                                 |
| 3         | TIA's, Moyamoya disease                                              | Lorazepam (1 mg), 10-mg prochlorperazine, 1-g acetazolamide | Severe nausea and emesis                                                                                            | No aspiration, patient remained at baseline              | Drug allergy, xenon, underlying disease                   |
| 4         | TIA's, Moyamoya disease                                              | Prochlorperazine (10 mg), 1-g acetazolamide                 | Seizure during procedure                                                                                            | Study terminated, patient evaluated in ED, no sequelae   | Xenon, procedure, underlying condition, sulfa allergy     |
| 5         | Ischemic stroke                                                      | Prochlorperazine (10 mg), 1-g acetazolamide                 | Hypertension to 242/108 mm Hg                                                                                       | Study terminated, patient returned to baseline           | Xenon, procedure, underlying condition                    |
| 6         | TIA's (history of hypertension, headaches, subdural hematoma, falls) | None noted                                                  | Hypertension to >200 mm Hg                                                                                          | Exam completed, blood pressure returned to baseline      | Underlying condition                                      |
| 7         | Carotid occlusion                                                    | Acetazolamide (1 g)                                         | Respiratory insufficiency 15 minutes after Xenon-CT                                                                 | Intubated then brought to ED, extubated without sequelae | Allergic reaction to acetazolamide                        |
